# Supplementary material for: Bryde’s whales produce Biotwang calls, which occur seasonally in long-term acoustic recordings from the central and western North Pacific
Source: Frontiers journal article supplement (doi:10.3389/fmars.2024.1394695), 2024-09-18
Supplement: Data_Sheet_1.docx [file Data_Sheet_1.docx]

**Geographical and seasonal occurrence of Bryde’s whale Biotwangs in the central and western North Pacific**

Ann Allen1*, Matt Harvey2, Lauren Harrell3, Megan Wood4, Angela R. Szesciorka5, Jennifer L. K. McCullough1, Erin M. Oleson1

1NOAA Pacific Islands Fisheries Science Center, Honolulu, HI, United States

2Google, Inc., Mountain view, CA, United States

3Google, Inc., Boulder, CO, United States

4Saltwater Inc, Under Contract to NOAA Pacific Islands Fisheries Science Center, Honolulu, HI, United States

5Marine Mammal Institute, Hatfield Marine Science Center, Oregon State University, 2030 SE Marine Science Drive, Newport, OR, United States

**Correspondence:**

Ann N. Allen

ann.n.allen@gmail.com


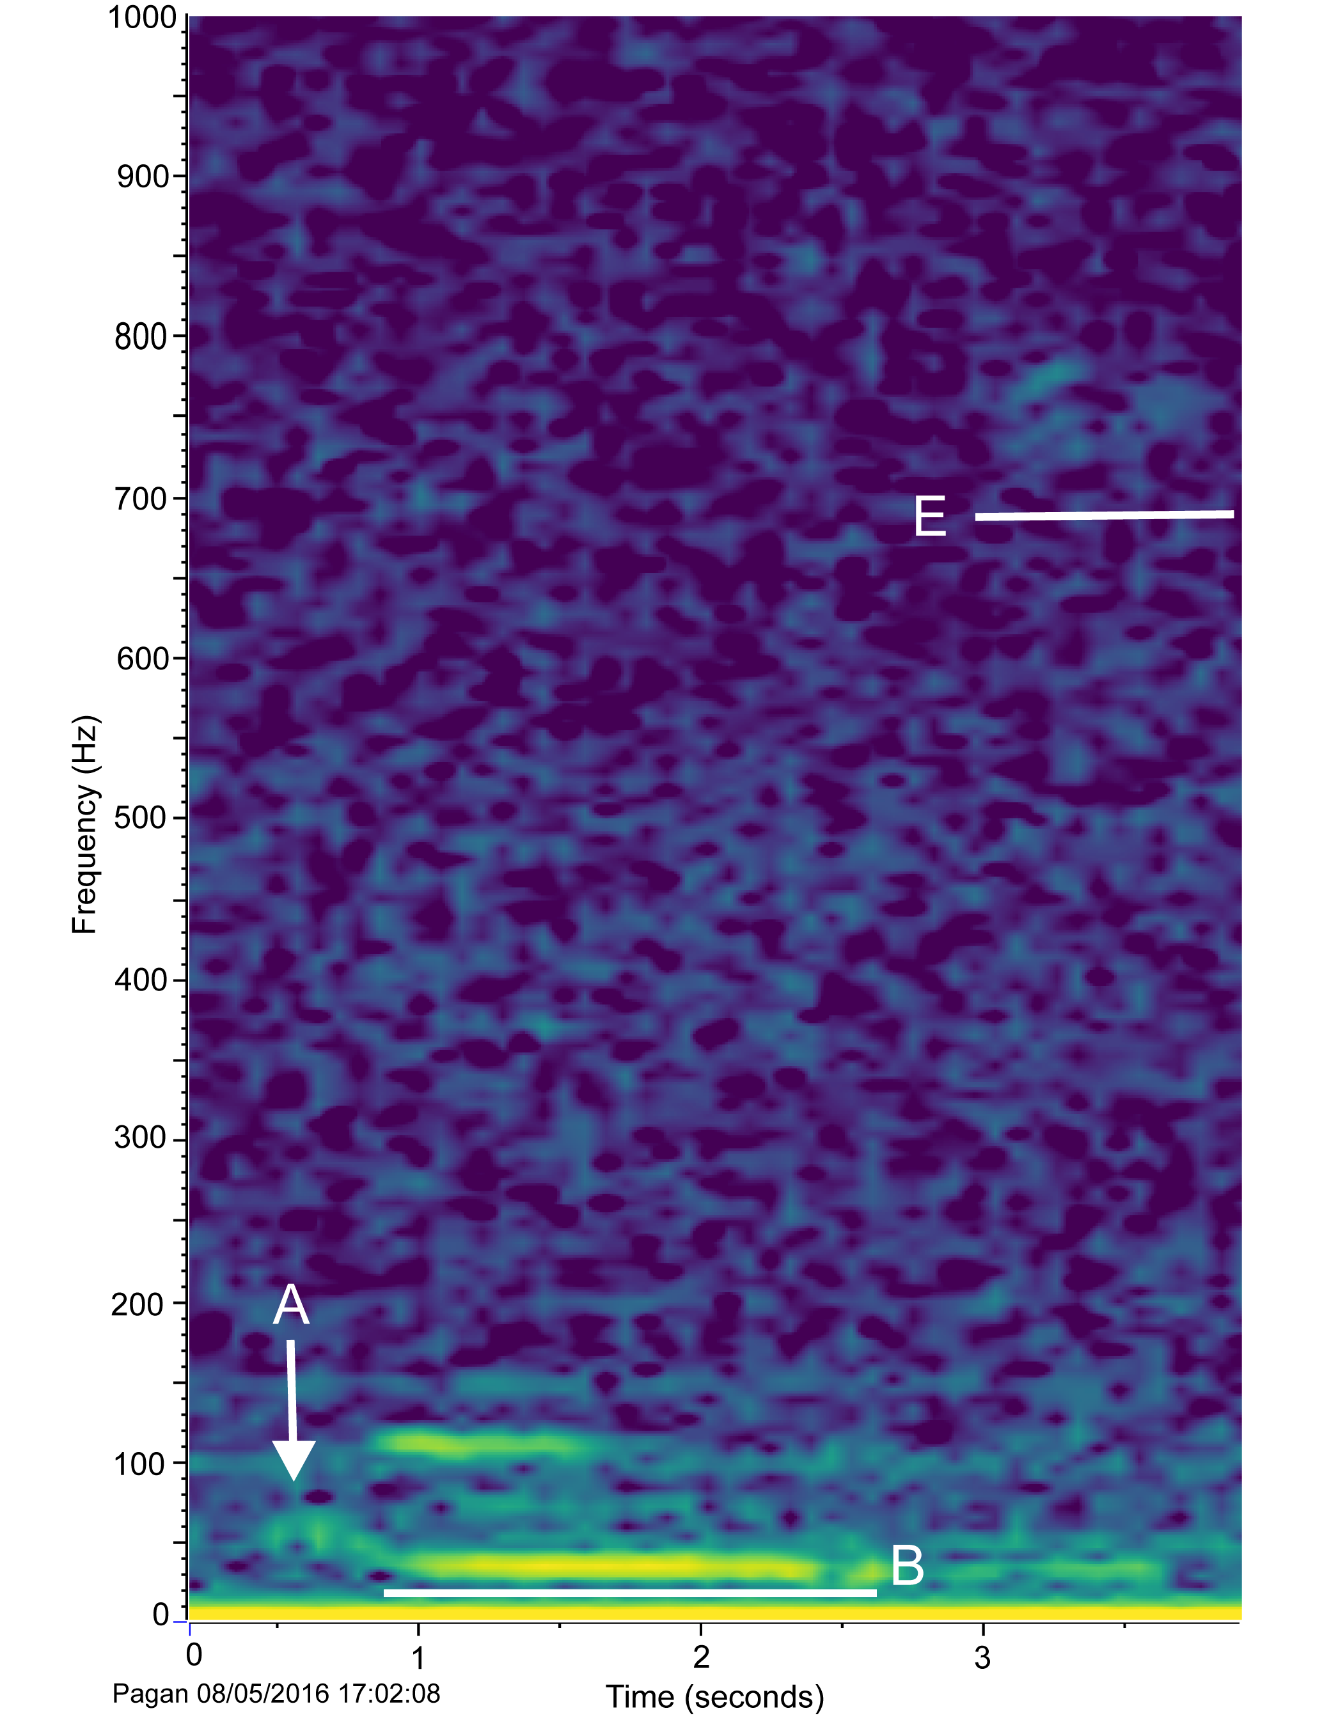


**Supplementary Figure 1:** Example of a Biotwang recorded on a HARP deployed at Pagan Island. The HARP was located in deep water (830m) which attenuates the high frequency components of the call. Labeled are the visible sections that correspond to the lower-frequency call components described in Nieukirk et al. (2016). A short tone centered around 60 Hz (Part A); a low-frequency moan centered around 35 Hz (Part B); and metallic-sounding upsweeps between 700-800 Hz (Part E).


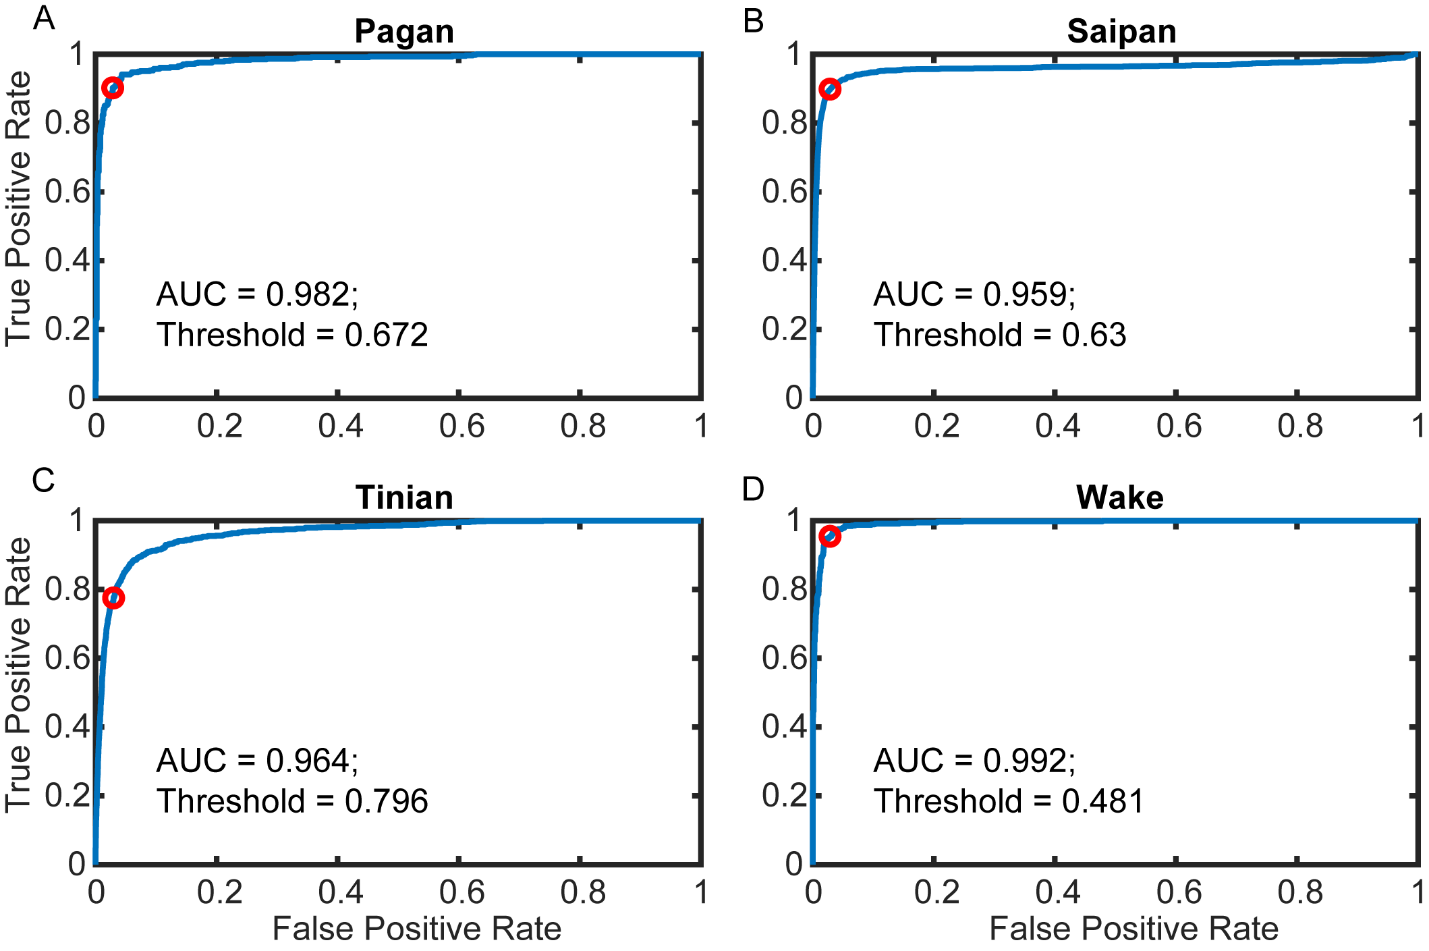


**Supplementary Figure 2:** Receiver Operator Curves for the 4 sites with significant biotwang presence. The AUC-ROC and the threshold for each site are displayed, targeting a <3% FPR. (A) Pagan, (B) Saipan, (C) Tinian, (D) Wake
